# Supplementary material
Source: HighWire-hosted journal article supplement (https://tech.snmjournals.org/highwire/filestream/8666/field_highwire_adjunct_files/1/195438_Supplemental_Data.pdf)
Supplement: 195438_Supplemental_Data.pdf [file 195438_Supplemental_Data.pdf]

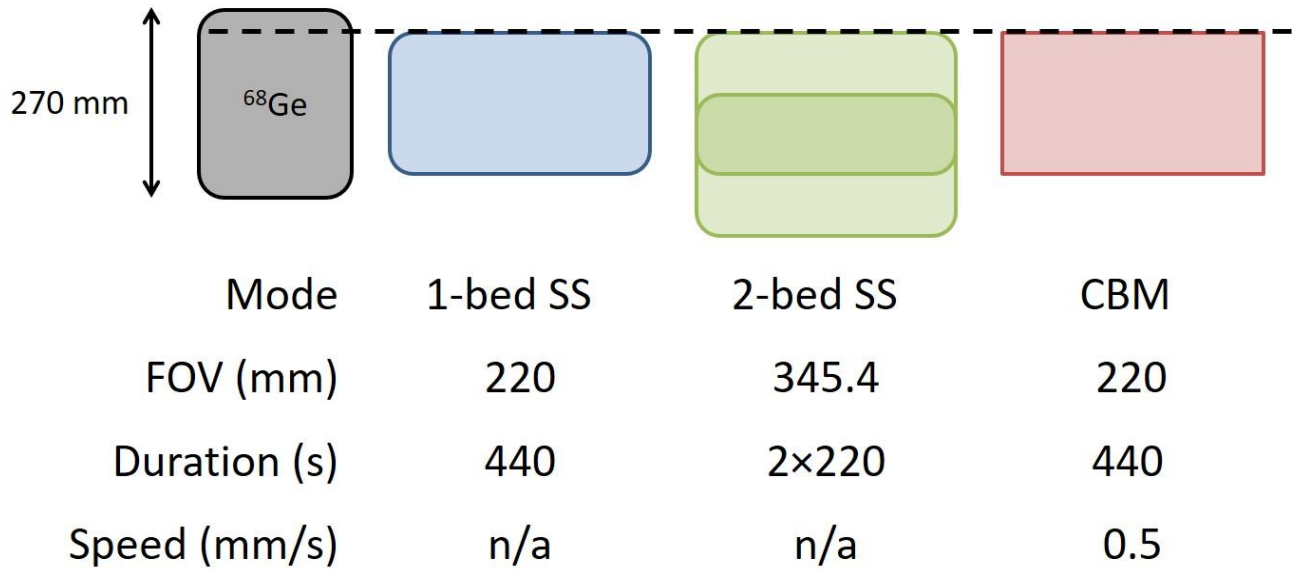

SUPPLEMENTAL FIGURE 1. Scan prescriptions for experimental verification of counting efficiencies in 3 acquisition modes.

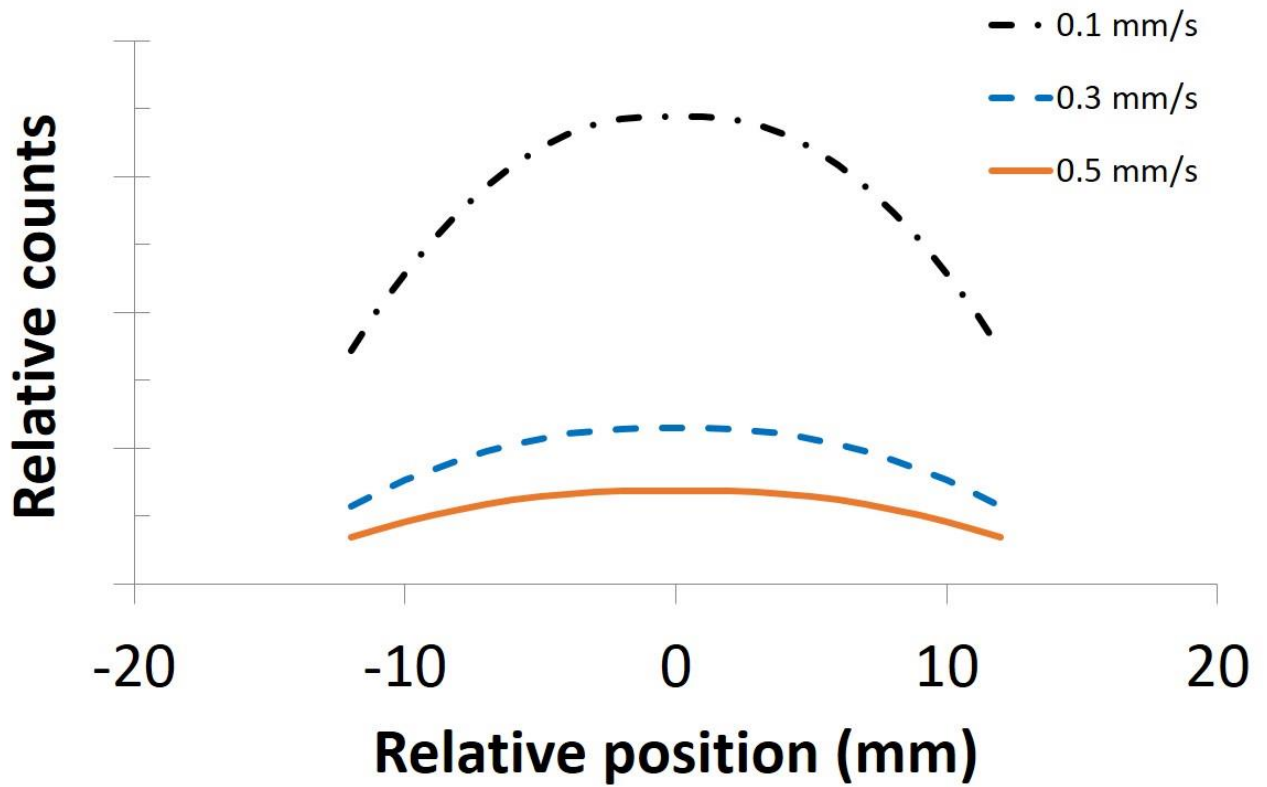

SUPPLEMENTAL FIGURE 2. CBM profiles variation in 1-aFOV (22-cm) scan as function of bed speed.

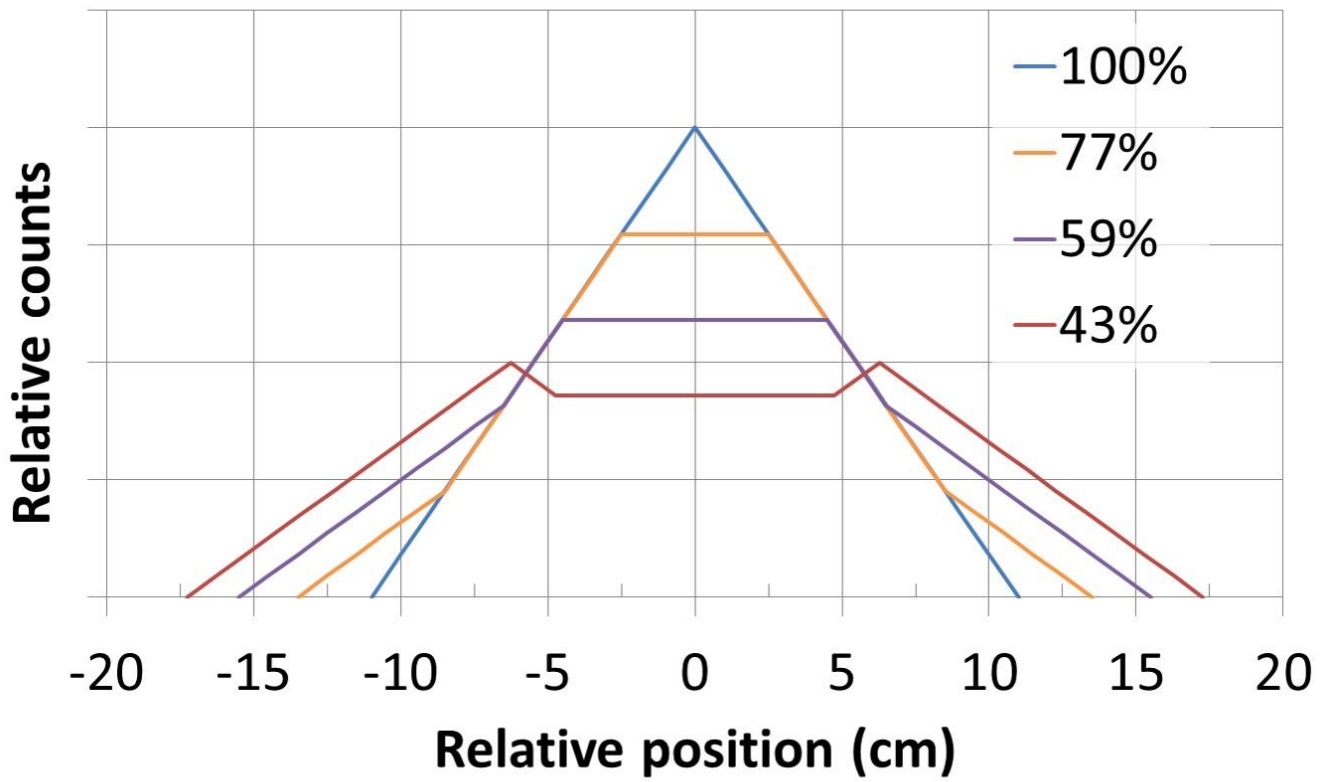

SUPPLEMENTAL FIGURE 3. Scan-length tailor-fitting in SS mode by adjusting amount of bed overlap.
